# Supplementary material for: Impact of Processing Methods on Mechanical Properties of Neat PLA and PLA Blends with PCL and PEO: Electrospinning vs Solvent Casting
Source: Preprints.org preprint supplement (doi:10.20944/preprints202410.1302.v1), 2024-10-16
Supplement: Supplementary file 1 [file supplementary]

**Supporting Information**

Impact of Processing Methods on Mechanical Properties of Neat PLA and PLA Blends with PCL and PEO: Electrospinning vs Solvent Casting

Qi-Hong Weng 1,†, Ming-Hsien Hu 2,3,† and Jin-Jia Hu 1,*

1 Department of Mechanical Engineering, National Yang Ming Chiao Tung University, Hsinchu 300, Taiwan; a0953661618@gmail.com (Q.-H.W.); jjhu@nycu.edu.tw (J.-J.H.)

2 Department of Post-Baccalaureate Medicine, National Chung Hsing University, Taichung 402, Taiwan; minghsienhu@nchu.edu.tw

3 Orthopedic Department, Showchwan Memorial Hospital, Changhua 500, Taiwan; minghsienhu@gmail.com

***** Correspondence: jjhu@nycu.edu.tw

† These authors contributed equally to this work.


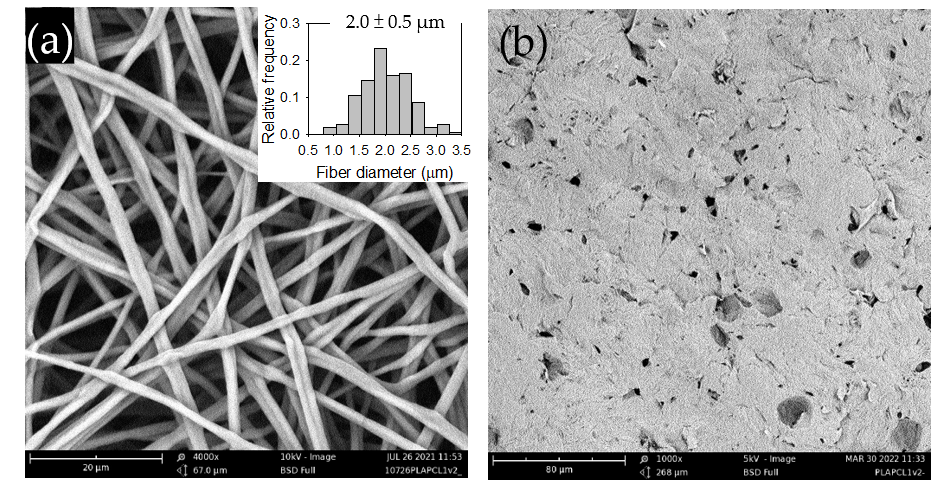


**Figure S1.** SEM images of the (a) electrospun and (b) solvent-cast films of a PLA/PCL blend (1:2). The inset in (a) shows the fiber diameter distribution.


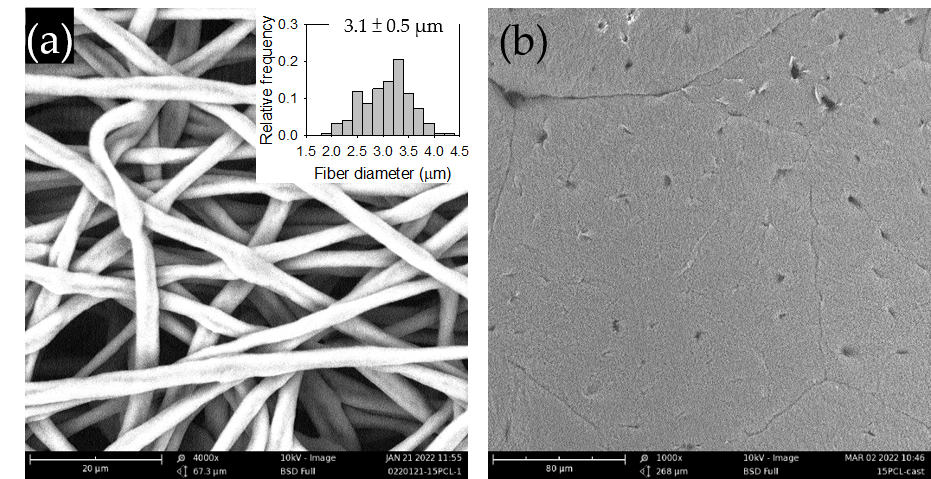


**Figure S2.** SEM images of the (a) electrospun and (b) solvent-cast PCL films. The inset in (a) displays the fiber diameter distribution.


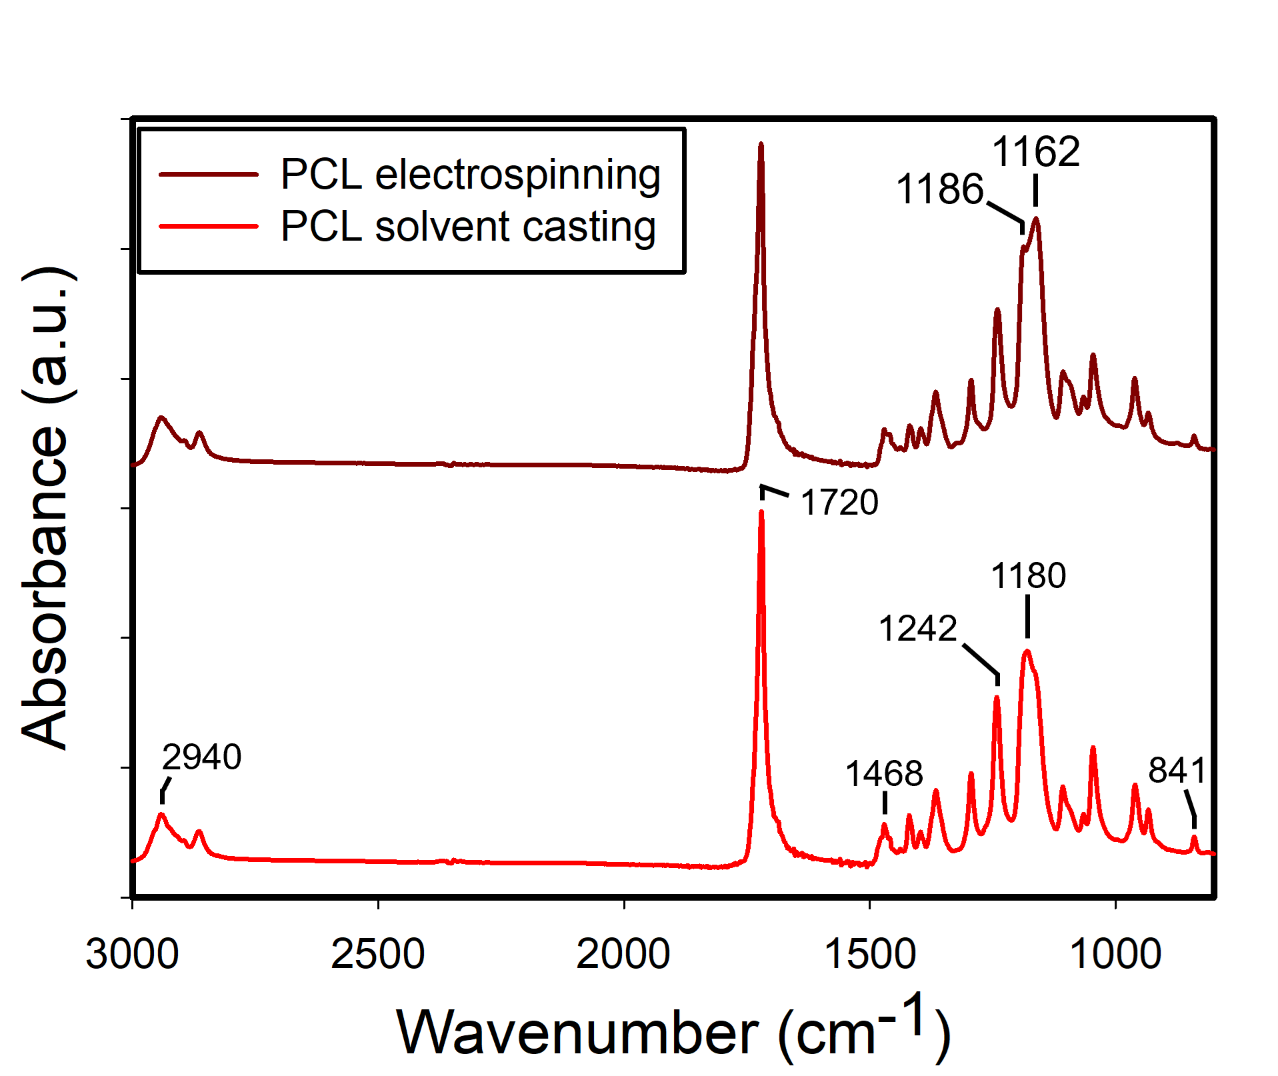


**Figure S3.** ATR-FTIR spectra of the electrospun and solvent-cast PCL films.


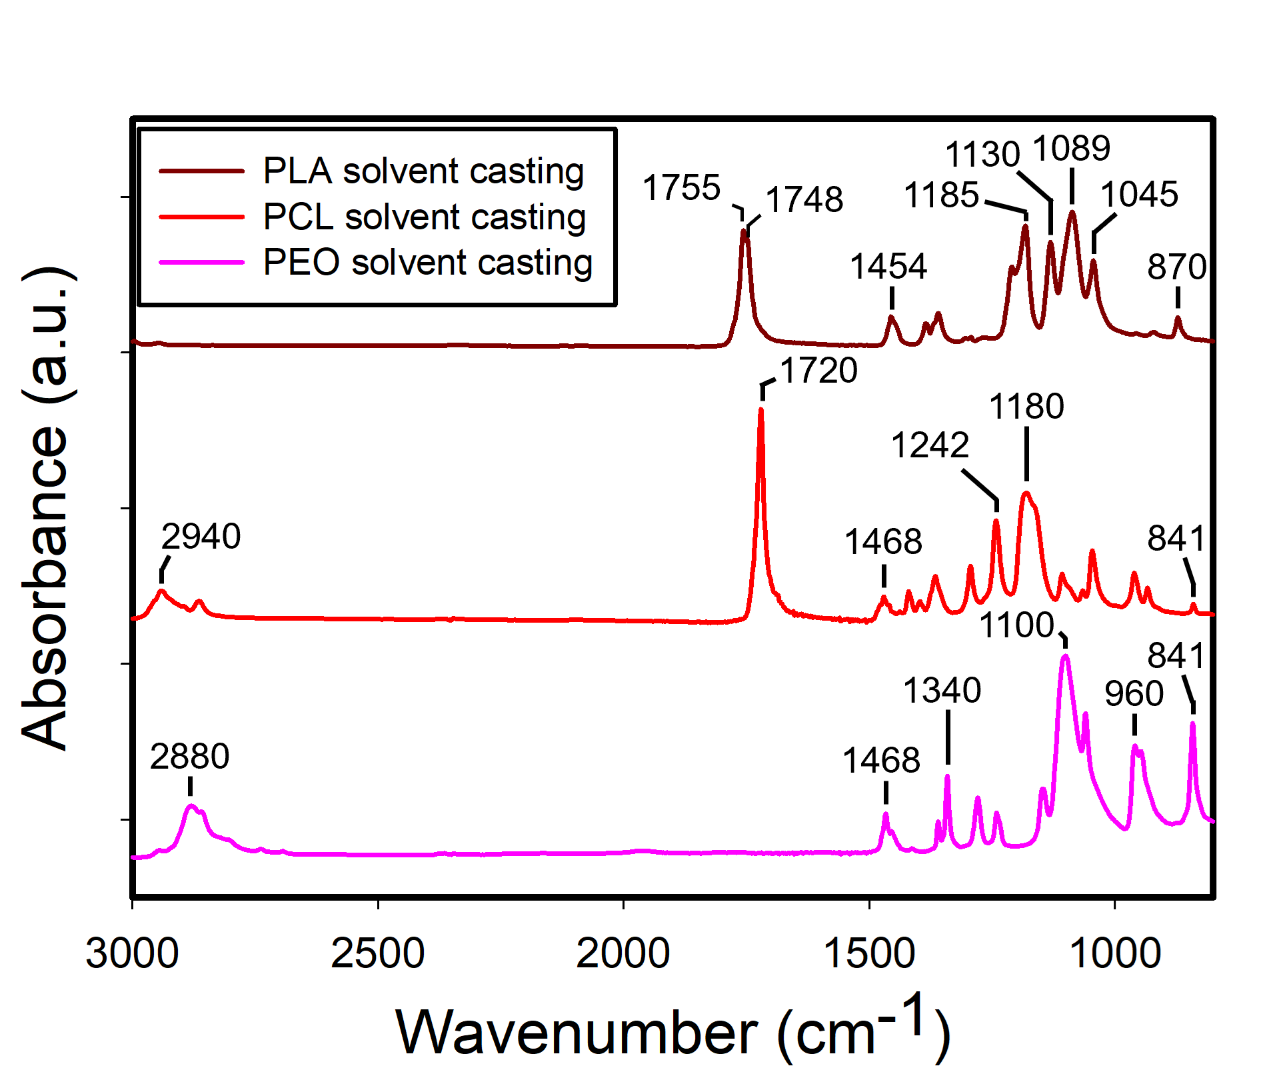


**Figure S4.** ATR-FTIR spectra of the solvent-cast films of PLA, PCL, and PEO.

**
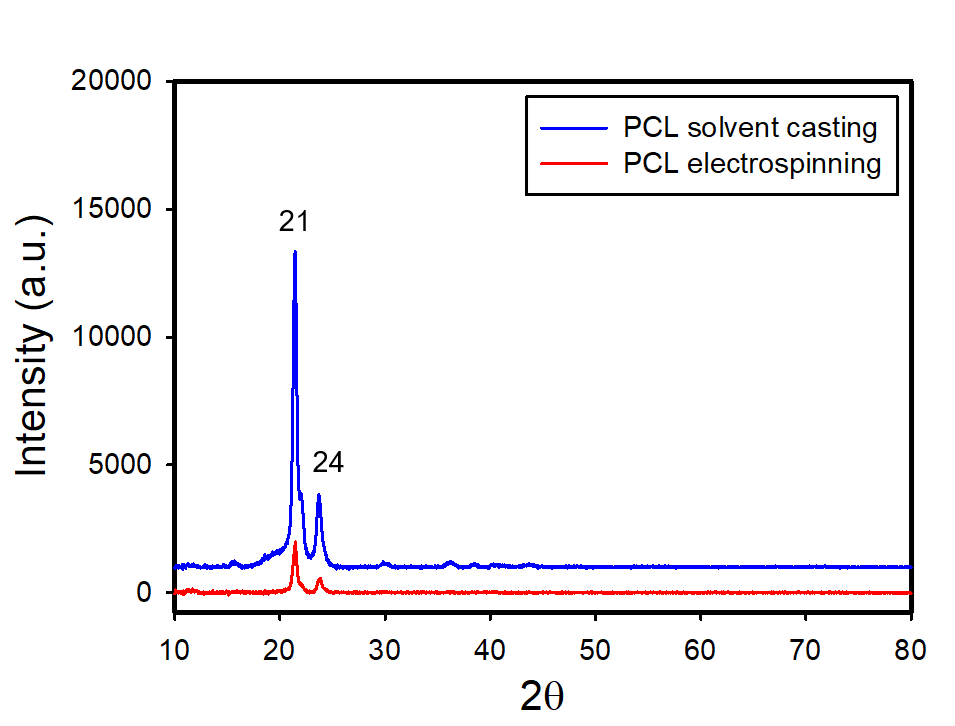
Figure S5.** XRD patterns of the electrospun and solvent-cast PCL films.

**
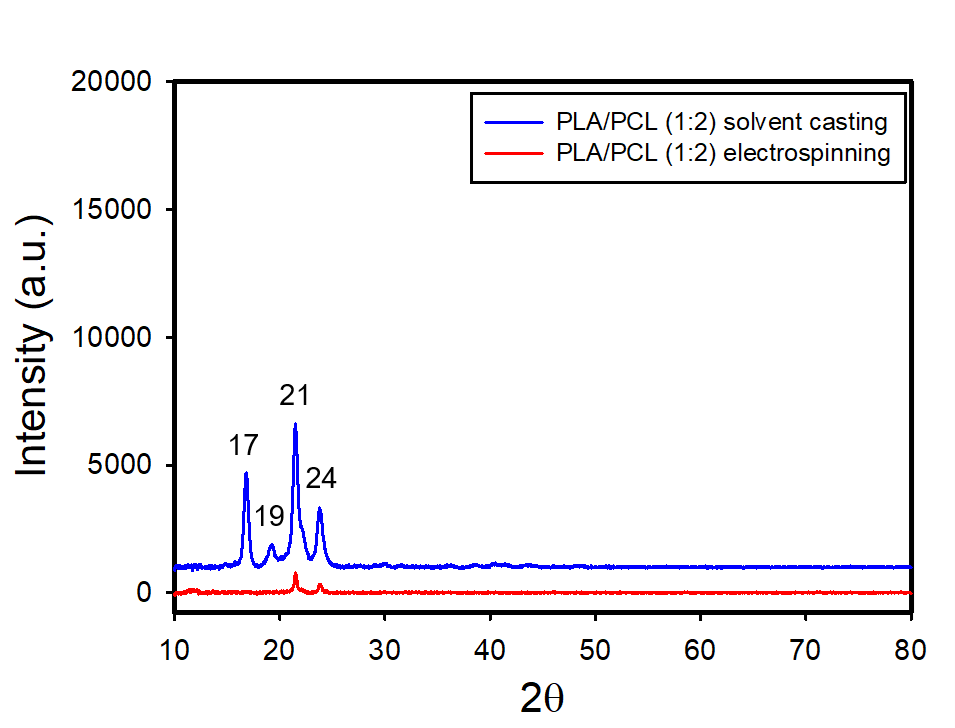
Figure S6.** XRD patterns of the electrospun and solvent-cast films of a PLA/PCL blend (1:2).


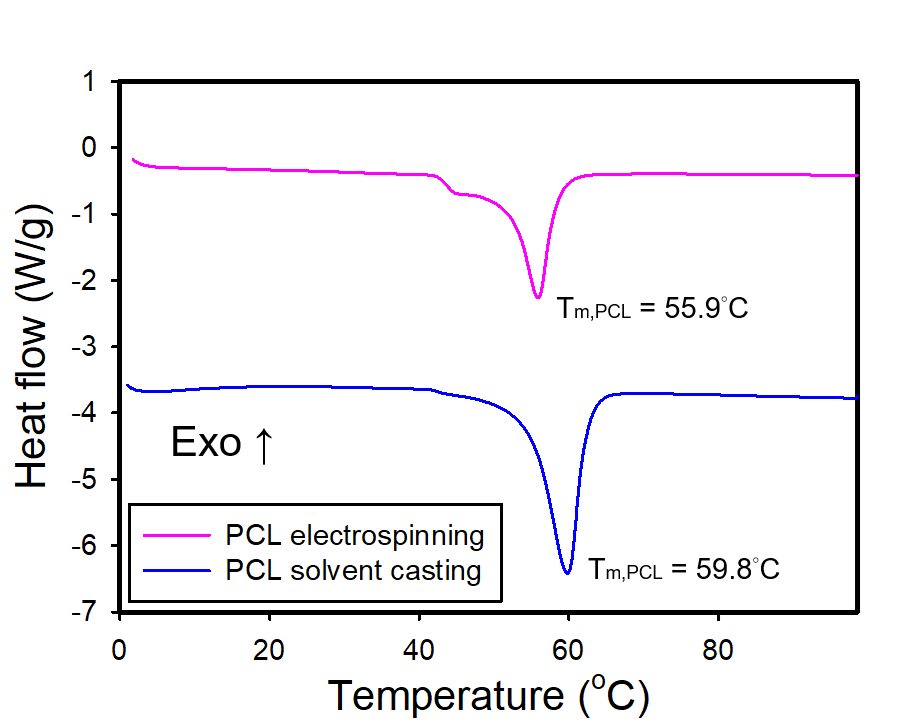


**Figure S7.** DSC thermograms of the electrospun and solvent-cast PCL films.


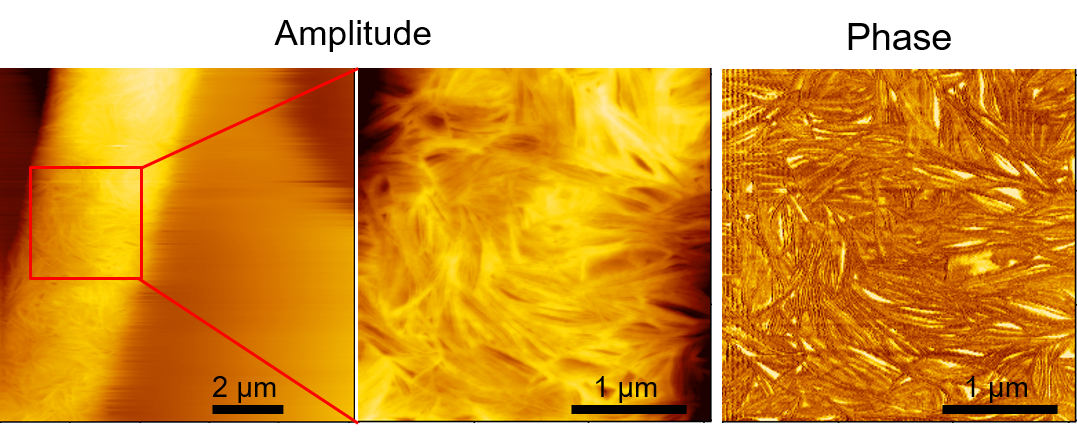


**Figure S8.** AFM image of a single electrospun PCL fiber. The red square highlights the region that is magnified in the adjacent image to the right.


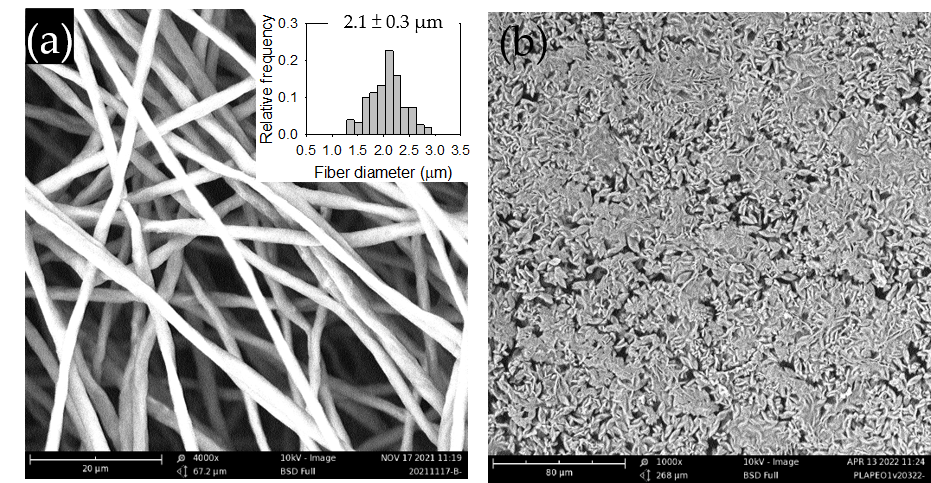


**Figure S9.** SEM images of the (a) electrospun and (b) solvent-cast films of a PLA/PEO blend (1:2). The inset in (a) shows the fiber diameter distribution.

**
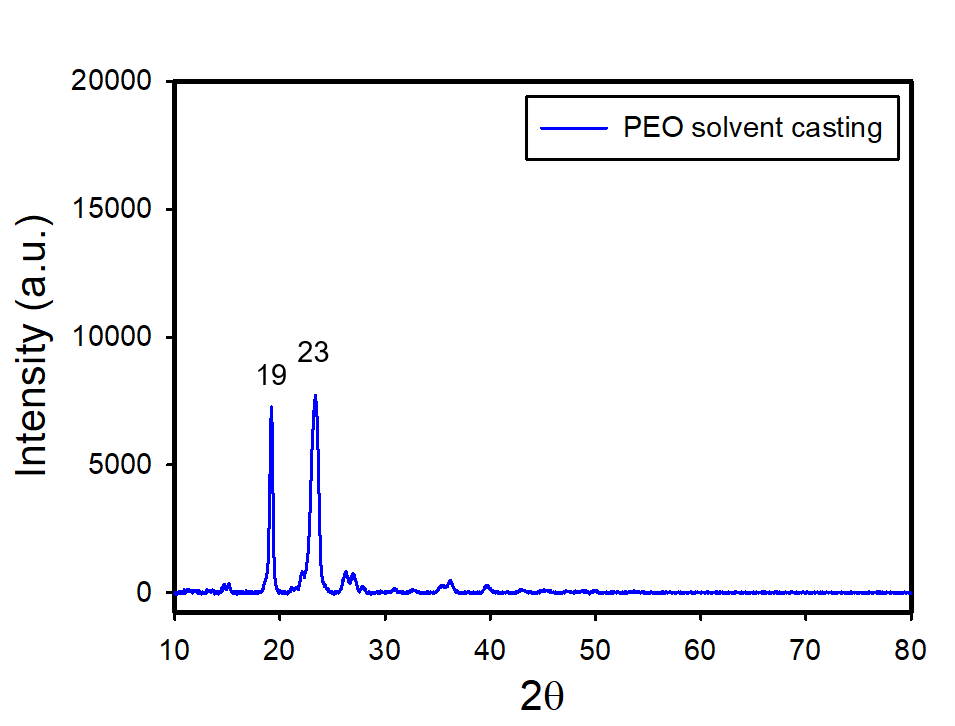
**

**Figure S10.** XRD pattern of the solvent-cast PEO films.


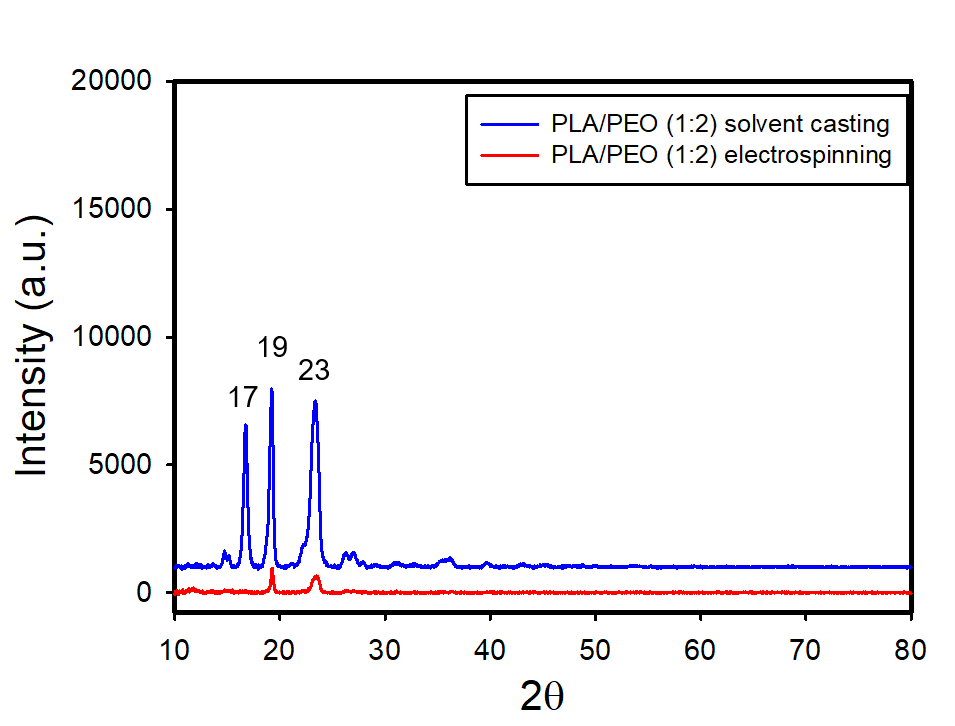


**Figure S11.** XRD patterns of the electrospun and solvent-cast films of a PLA/PEO blend (1:2).


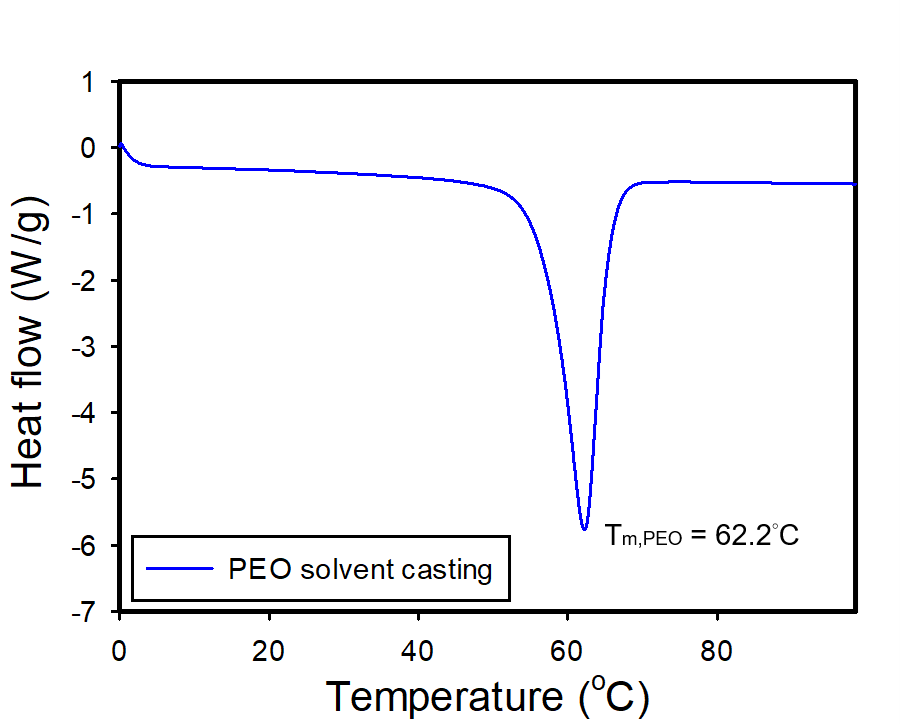


**Figure S12.** DSC thermogram of the solvent-cast PEO films.
